# Supplementary material for: Association of Nonsteroidal Anti-inflammatory Drug Use With Stroke Among Dialysis Patients
Source: PubMed Central journal article supplement — Kidney Int Rep. 2017 Jan 17;2(3):400–9. doi: 10.1016/j.ekir.2017.01.004 (PMC5678629; doi:10.1016/j.ekir.2017.01.004), 2017-01-17
Supplement: mmc1.pdf [file mmc1.pdf]

Supplemental Table 1. List of different classes of selective and non-selective NSAIDs, respectively.

| NSAIDs                  |                                                                                                                    |
|-------------------------|--------------------------------------------------------------------------------------------------------------------|
| <b>Selective NSAIDs</b> | celecoxib, etoricoxib                                                                                              |
| <b>Non-selective</b>    |                                                                                                                    |
| <b>Salicylates</b>      | aspirin, diflunisal                                                                                                |
| <b>Propionic acid</b>   | ibuprofen, naproxen, ketoprofen, fenbufen, fenoprofen, alminoprofen, flurbiprofen                                  |
| <b>Acetic acid</b>      | indomethacin, alclofenac, aceclofenac, acemetacin, nabumetone, diclofenac, etodolac, ketorolac, sulindac, tolmetin |
| <b>Enolic acid</b>      | meloxicam, piroxicam, tenoxicam, nimesulide                                                                        |
| <b>Anthranilic acid</b> | flufenamic acid, mefenamic acid, niflumic acid, tiaprofenic acid, tolfenamic acid                                  |
