# Supplementary material for: Association of Nonsteroidal Anti-inflammatory Drug Use With Stroke Among Dialysis Patients
Source: PubMed Central journal article supplement — Kidney Int Rep. 2017 Jan 17;2(3):400–9. doi: 10.1016/j.ekir.2017.01.004 (PMC5678629; doi:10.1016/j.ekir.2017.01.004), 2017-01-17
Supplement: mmc2.pdf [file mmc2.pdf]

Supplemental Table 2a. Risk of stroke, ischemic stroke and hemorrhagic stroke associated with current use of selective, nonselective and individual NSAIDs among patients with renal dialysis and hypertension.

|                                   | Case period<br>(1-30 days<br>before index<br>date) |       | Control period<br>(91-120 days<br>before index date) |       | Unadjusted  |              | Adjusted    |              |
|-----------------------------------|----------------------------------------------------|-------|------------------------------------------------------|-------|-------------|--------------|-------------|--------------|
|                                   | n                                                  | %     | n                                                    | %     | OR          | 95% CI       | OR          | 95% CI       |
| <b>Stroke (n=743)</b>             |                                                    |       |                                                      |       |             |              |             |              |
| NSAIDs overall                    | 306                                                | 41.18 | 255                                                  | 34.32 | <b>1.61</b> | (1.22-2.11)  | <b>1.35</b> | (1.01-1.81)  |
| Selective                         | 24                                                 | 3.23  | 21                                                   | 2.83  | 1.21        | (0.60-2.46)  | 1.08        | (0.51-2.28)  |
| Nonselective                      | 296                                                | 39.84 | 243                                                  | 32.71 | <b>1.62</b> | (1.24-2.12)  | <b>1.37</b> | (1.03-1.83)  |
| Salicylates                       | 156                                                | 21.00 | 142                                                  | 19.11 | 1.33        | (0.89-1.99)  | 1.26        | (0.82-1.94)  |
| Propionic acid                    | 33                                                 | 4.44  | 14                                                   | 1.88  | <b>2.90</b> | (1.41-5.95)  | <b>2.60</b> | (1.20-5.60)  |
| Acetic acid                       | 117                                                | 15.75 | 84                                                   | 11.31 | <b>1.60</b> | (1.14-2.24)  | 1.22        | (0.85-1.75)  |
| Enolic acid                       | 40                                                 | 5.38  | 24                                                   | 3.23  | <b>1.89</b> | (1.07-3.34)  | 1.67        | (0.92-3.04)  |
| Anthranilic acid                  | 34                                                 | 4.58  | 15                                                   | 2.02  | <b>2.46</b> | (1.29-4.69)  | <b>2.11</b> | (1.07-4.16)  |
| Oral                              | 289                                                | 38.90 | 244                                                  | 32.84 | <b>1.55</b> | (1.17-2.04)  | 1.31        | (0.97-1.76)  |
| IV                                | 51                                                 | 6.86  | 24                                                   | 3.23  | <b>2.69</b> | (1.51-4.77)  | <b>2.21</b> | (1.22-4.01)  |
| <b>Ischemic Stroke (n=584)</b>    |                                                    |       |                                                      |       |             |              |             |              |
| NSAIDs overall                    | 245                                                | 41.95 | 204                                                  | 34.93 | <b>1.64</b> | (1.20-2.24)  | 1.30        | (0.93-1.82)  |
| Selective                         | 22                                                 | 3.77  | 21                                                   | 3.60  | 1.07        | (0.52-2.22)  | 0.96        | (0.44-2.10)  |
| Nonselective                      | 235                                                | 40.24 | 193                                                  | 33.05 | <b>1.64</b> | (1.21-2.22)  | 1.31        | (0.94-1.82)  |
| Salicylates                       | 129                                                | 22.09 | 117                                                  | 20.03 | 1.34        | (0.87-2.08)  | 1.22        | (0.75-1.96)  |
| Propionic acid                    | 24                                                 | 4.11  | 8                                                    | 1.37  | <b>3.67</b> | (1.49-9.04)  | <b>2.83</b> | (1.08-7.44)  |
| Acetic acid                       | 92                                                 | 15.75 | 68                                                   | 11.64 | <b>1.56</b> | (1.06-2.29)  | 1.14        | (0.75-1.73)  |
| Enolic acid                       | 35                                                 | 5.99  | 20                                                   | 3.42  | <b>2.07</b> | (1.09-3.92)  | 1.74        | (0.89-3.43)  |
| Anthranilic acid                  | 22                                                 | 3.77  | 11                                                   | 1.88  | 2.10        | (0.99-4.46)  | 1.82        | (0.80-4.10)  |
| Oral                              | 232                                                | 39.73 | 195                                                  | 33.39 | <b>1.59</b> | (1.16-2.18)  | 1.27        | (0.90-1.78)  |
| IV                                | 40                                                 | 6.85  | 18                                                   | 3.08  | <b>2.83</b> | (1.47-5.47)  | <b>2.21</b> | (1.11-4.40)  |
| <b>Hemorrhagic Stroke (n=159)</b> |                                                    |       |                                                      |       |             |              |             |              |
| NSAIDs overall                    | 61                                                 | 38.36 | 51                                                   | 32.08 | 1.50        | (0.85-2.64)  | 1.40        | (0.75-2.61)  |
| Selective                         | 2                                                  | 1.26  | 0                                                    | 0     | NA          | NA           | NA          | NA           |
| Nonselective                      | 61                                                 | 38.36 | 50                                                   | 31.45 | 1.55        | (0.88-2.72)  | 1.51        | (0.81-2.82)  |
| Salicylates                       | 27                                                 | 16.98 | 25                                                   | 15.72 | 1.29        | (0.48-3.45)  | 1.38        | (0.45-4.25)  |
| Propionic acid                    | 9                                                  | 5.66  | 6                                                    | 3.77  | 1.75        | (0.51-5.98)  | 1.86        | (0.45-7.71)  |
| Acetic acid                       | 25                                                 | 15.72 | 16                                                   | 10.06 | 1.75        | (0.86-3.56)  | 1.59        | (0.73-3.48)  |
| Enolic acid                       | 5                                                  | 3.14  | 4                                                    | 2.52  | 1.25        | (0.34-4.66)  | 1.22        | (0.31-4.82)  |
| Anthranilic acid                  | 12                                                 | 7.55  | 4                                                    | 2.52  | <b>3.67</b> | (1.02-13.14) | <b>6.75</b> | (1.28-35.65) |
| Oral                              | 57                                                 | 35.85 | 49                                                   | 30.82 | 1.42        | (0.79-2.56)  | 1.42        | (0.74-2.74)  |
| IV                                | 11                                                 | 6.92  | 6                                                    | 3.77  | 2.25        | (0.69-7.30)  | 1.86        | (0.51-6.78)  |
