# Supplementary material for: Association of Nonsteroidal Anti-inflammatory Drug Use With Stroke Among Dialysis Patients
Source: PubMed Central journal article supplement — Kidney Int Rep. 2017 Jan 17;2(3):400–9. doi: 10.1016/j.ekir.2017.01.004 (PMC5678629; doi:10.1016/j.ekir.2017.01.004), 2017-01-17
Supplement: mmc3.pdf [file mmc3.pdf]

Supplemental Table 2b. Risk of stroke, ischemic stroke and hemorrhagic stroke associated with current use of selective, nonselective and individual NSAIDs among patients with renal dialysis, but without hypertension.

|                                  | Case period<br>(1-30 days<br>before index<br>date) |       | Control period<br>(91-120 days<br>before index<br>date) |       | Unadjusted  |              | Adjusted |              |
|----------------------------------|----------------------------------------------------|-------|---------------------------------------------------------|-------|-------------|--------------|----------|--------------|
|                                  | n                                                  | %     | n                                                       | %     | OR          | 95% CI       | OR       | 95% CI       |
| <b>Stroke (n=447)</b>            |                                                    |       |                                                         |       |             |              |          |              |
| NSAIDs overall                   | 139                                                | 31.10 | 120                                                     | 26.85 | 1.49        | (0.99-2.23)  | 1.16     | (0.74-1.81)  |
| Selective                        | 23                                                 | 5.15  | 20                                                      | 4.47  | 1.33        | (0.56-3.16)  | 1.43     | (0.57-3.62)  |
| Nonselective                     | 123                                                | 27.52 | 110                                                     | 24.61 | 1.33        | (0.88-2.02)  | 0.99     | (0.62-1.57)  |
| Salicylates                      | 51                                                 | 11.41 | 50                                                      | 11.19 | 1.05        | (0.57-1.94)  | 0.71     | (0.35-1.43)  |
| Propionic acid                   | 18                                                 | 4.03  | 13                                                      | 2.91  | 1.83        | (0.68-4.96)  | 1.63     | (0.55-4.78)  |
| Acetic acid                      | 49                                                 | 10.96 | 42                                                      | 9.40  | 1.27        | (0.76-2.12)  | 0.94     | (0.53-1.65)  |
| Enolic acid                      | 14                                                 | 3.13  | 17                                                      | 3.80  | 0.70        | (0.27-1.84)  | 0.92     | (0.33-2.61)  |
| Anthranilic acid                 | 11                                                 | 2.46  | 6                                                       | 1.34  | 2.00        | (0.68-5.85)  | 1.49     | (0.47-4.75)  |
| Oral                             | 125                                                | 27.96 | 112                                                     | 25.06 | 1.32        | (0.88-1.98)  | 1.03     | (0.65-1.62)  |
| IV                               | 25                                                 | 5.59  | 16                                                      | 3.58  | 1.75        | (0.86-3.56)  | 1.65     | (0.77-3.54)  |
| <b>Ischemic Stroke (n=351)</b>   |                                                    |       |                                                         |       |             |              |          |              |
| NSAIDs overall                   | 116                                                | 33.05 | 96                                                      | 27.35 | <b>1.71</b> | (1.08-2.73)  | 1.34     | (0.79-2.29)  |
| Selective                        | 19                                                 | 5.41  | 16                                                      | 4.56  | 1.50        | (0.53-4.21)  | 1.84     | (0.58-5.79)  |
| Nonselective                     | 104                                                | 29.63 | 89                                                      | 25.36 | 1.50        | (0.95-2.38)  | 1.12     | (0.66-1.90)  |
| Salicylates                      | 44                                                 | 12.54 | 40                                                      | 11.40 | 1.25        | (0.65-2.41)  | 0.83     | (0.38-1.81)  |
| Propionic acid                   | 16                                                 | 4.56  | 11                                                      | 3.13  | 2.00        | (0.68-5.85)  | 1.93     | (0.58-6.37)  |
| Acetic acid                      | 41                                                 | 11.68 | 34                                                      | 9.69  | 1.33        | (0.76-2.35)  | 0.97     | (0.51-1.85)  |
| Enolic acid                      | 13                                                 | 3.70  | 15                                                      | 4.27  | 0.78        | (0.29-2.09)  | 1.15     | (0.39-3.42)  |
| Anthranilic acid                 | 8                                                  | 2.28  | 6                                                       | 1.71  | 1.40        | (0.44-4.41)  | 1.01     | (0.29-3.52)  |
| Oral                             | 106                                                | 30.20 | 89                                                      | 25.36 | 1.57        | (0.99-2.48)  | 1.24     | (0.73-2.11)  |
| IV                               | 20                                                 | 5.70  | 14                                                      | 3.99  | 1.55        | (0.72-3.30)  | 1.57     | (0.68-3.64)  |
| <b>Hemorrhagic Stroke (n=96)</b> |                                                    |       |                                                         |       |             |              |          |              |
| NSAIDs overall                   | 23                                                 | 23.96 | 24                                                      | 25.00 | 0.91        | (0.39-2.14)  | 0.61     | (0.22-1.67)  |
| Selective                        | 4                                                  | 4.17  | 4                                                       | 4.17  | 1.00        | (0.20-4.96)  | 1.31     | (0.20-8.57)  |
| Nonselective                     | 19                                                 | 19.79 | 21                                                      | 21.88 | 0.78        | (0.29-2.09)  | 0.38     | (0.12-1.28)  |
| Salicylates                      | 7                                                  | 7.29  | 10                                                      | 10.42 | 0.25        | (0.03-2.24)  | NA       | NA           |
| Propionic acid                   | 2                                                  | 2.08  | 2                                                       | 2.08  | 1.00        | (0.06-15.99) | 0.60     | (0.03-10.68) |
| Acetic acid                      | 8                                                  | 8.33  | 8                                                       | 8.33  | 1.00        | (0.29-3.45)  | 0.57     | (0.14-2.26)  |
| Enolic acid                      | 1                                                  | 1.04  | 2                                                       | 2.08  | NA          | NA           | NA       | NA           |
| Anthranilic acid                 | 3                                                  | 3.13  | 0                                                       | 0     | NA          | NA           | NA       | NA           |
| Oral                             | 19                                                 | 19.79 | 23                                                      | 23.96 | 0.64        | (0.25-1.64)  | 0.43     | (0.14-1.34)  |
| IV                               | 5                                                  | 5.21  | 2                                                       | 2.08  | 4.00        | (0.45-35.79) | 1.83     | (0.17-19.78) |
