# Supplementary material for: Association of Nonsteroidal Anti-inflammatory Drug Use With Stroke Among Dialysis Patients
Source: PubMed Central journal article supplement — Kidney Int Rep. 2017 Jan 17;2(3):400–9. doi: 10.1016/j.ekir.2017.01.004 (PMC5678629; doi:10.1016/j.ekir.2017.01.004), 2017-01-17
Supplement: mmc4.pdf [file mmc4.pdf]

Supplemental Table 3. Risk of stroke, ischemic stroke and hemorrhagic stroke associated with current use of selective, nonselective and individual NSAIDs in patients with renal dialysis including patients with prior AMI history.

|                            | Case period<br>(1-30 days<br>before index<br>date) |       | Control period<br>(91-120 days<br>before index<br>date) |       | Unadjusted  |              | Adjusted    |              |
|----------------------------|----------------------------------------------------|-------|---------------------------------------------------------|-------|-------------|--------------|-------------|--------------|
|                            | n                                                  | %     | n                                                       | %     | OR          | 95% CI       | OR          | 95% CI       |
| Stroke (n=1,329)           |                                                    |       |                                                         |       |             |              |             |              |
| NSAIDs overall             | 509                                                | 38.30 | 430                                                     | 32.36 | <b>1.59</b> | (1.28-1.98)  | <b>1.30</b> | (1.03-1.63)  |
| Selective                  | 49                                                 | 3.69  | 43                                                      | 3.24  | 1.25        | (0.73-2.14)  | 1.15        | (0.66-2.01)  |
| Nonselective               | 481                                                | 36.19 | 406                                                     | 30.55 | <b>1.56</b> | (1.25-1.93)  | <b>1.26</b> | (1.00-1.59)  |
| Salicylates                | 252                                                | 18.96 | 229                                                     | 17.23 | 1.33        | (0.97-1.81)  | 1.19        | (0.85-1.66)  |
| Propionic acid             | 56                                                 | 4.21  | 33                                                      | 2.48  | <b>2.10</b> | (1.25-3.52)  | <b>1.75</b> | (1.00-3.04)  |
| Acetic acid                | 183                                                | 13.77 | 134                                                     | 10.08 | <b>1.58</b> | (1.20-2.07)  | 1.21        | (0.90-1.61)  |
| Enolic acid                | 58                                                 | 4.36  | 48                                                      | 3.61  | 1.29        | (0.83-2.03)  | 1.15        | (0.72-1.85)  |
| Anthranilic acid           | 51                                                 | 3.84  | 23                                                      | 1.73  | <b>2.40</b> | (1.42-4.04)  | <b>1.85</b> | (1.06-3.23)  |
| Oral                       | 475                                                | 35.74 | 409                                                     | 30.78 | <b>1.49</b> | (1.20-1.86)  | 1.22        | (0.97-1.54)  |
| IV                         | 82                                                 | 6.17  | 45                                                      | 3.39  | <b>2.12</b> | (1.40-3.21)  | <b>1.75</b> | (1.14-2.68)  |
| Ischemic Stroke (n=1050)   |                                                    |       |                                                         |       |             |              |             |              |
| NSAIDs overall             | 416                                                | 39.62 | 347                                                     | 33.05 | <b>1.68</b> | (1.32-2.15)  | <b>1.32</b> | (1.02-1.72)  |
| Selective                  | 42                                                 | 4.00  | 39                                                      | 3.71  | 1.14        | (0.64-2.05)  | 1.05        | (0.57-1.95)  |
| Nonselective               | 392                                                | 37.33 | 327                                                     | 31.14 | <b>1.62</b> | (1.27-2.07)  | 1.26        | (0.97-1.64)  |
| Salicylates                | 211                                                | 20.10 | 188                                                     | 17.90 | <b>1.40</b> | (1.00-1.96)  | 1.22        | (0.85-1.76)  |
| Propionic acid             | 45                                                 | 4.29  | 25                                                      | 2.38  | <b>2.25</b> | (1.25-4.05)  | 1.75        | (0.94-3.28)  |
| Acetic acid                | 147                                                | 14.00 | 109                                                     | 10.38 | <b>1.57</b> | (1.15-2.13)  | 1.17        | (0.84-1.63)  |
| Enolic acid                | 51                                                 | 4.86  | 41                                                      | 3.90  | 1.36        | (0.83-2.21)  | 1.17        | (0.69-1.97)  |
| Anthranilic acid           | 36                                                 | 3.43  | 19                                                      | 1.81  | <b>2.00</b> | (1.12-3.58)  | 1.54        | (0.82-2.90)  |
| Oral                       | 390                                                | 37.14 | 330                                                     | 31.43 | <b>1.58</b> | (1.24-2.03)  | 1.26        | (0.97-1.64)  |
| IV                         | 65                                                 | 6.19  | 36                                                      | 3.43  | <b>2.07</b> | (1.31-3.28)  | <b>1.69</b> | (1.04-2.73)  |
| Hemorrhagic Stroke (n=279) |                                                    |       |                                                         |       |             |              |             |              |
| NSAIDs overall             | 93                                                 | 33.33 | 83                                                      | 29.75 | 1.31        | (0.83-2.08)  | 1.19        | (0.73-1.96)  |
| Selective                  | 7                                                  | 2.51  | 4                                                       | 1.43  | 2.00        | (0.50-8.00)  | 1.80        | (0.43-7.47)  |
| Nonselective               | 89                                                 | 31.90 | 79                                                      | 28.32 | 1.33        | (0.83-2.14)  | 1.23        | (0.74-2.07)  |
| Salicylates                | 41                                                 | 14.70 | 41                                                      | 14.70 | 1.00        | (0.45-2.23)  | 0.98        | (0.41-2.37)  |
| Propionic acid             | 11                                                 | 3.94  | 8                                                       | 2.87  | 1.60        | (0.52-4.89)  | 1.56        | (0.44-5.60)  |
| Acetic acid                | 36                                                 | 12.90 | 25                                                      | 8.96  | 1.61        | (0.90-2.90)  | 1.37        | (0.72-2.61)  |
| Enolic acid                | 7                                                  | 2.51  | 7                                                       | 2.51  | 1.00        | (0.32-3.10)  | 0.97        | (0.29-3.23)  |
| Anthranilic acid           | 15                                                 | 5.38  | 4                                                       | 1.43  | <b>4.67</b> | (1.34-16.24) | <b>7.20</b> | (1.53-33.95) |
| Oral                       | 85                                                 | 30.47 | 79                                                      | 28.32 | 1.19        | (0.74-1.92)  | 1.13        | (0.67-1.90)  |
| IV                         | 17                                                 | 6.09  | 9                                                       | 3.23  | 2.33        | (0.90-6.07)  | 1.80        | (0.65-4.97)  |
